# Supplementary material for: Gut Microbial Stability is Associated with Greater Endurance Performance in Athletes Undertaking Dietary Periodization
Source: PubMed Central journal article supplement (PMC9238380; doi:10.1128/msystems.00129-22), 2022-05-17
Supplement: msystems.00129-22-s0001.pdf [file msystems.00129-22-s0001.pdf]

## 1 Supplementary methods

### 2 Dynamic changes in the gut microbiota in response to acute high protein and high carbohydrate diets 3 in endurance athletes.

4 Furber, M.J.W., Young, G.R., Holt, G.S, Pyle, S. Howatson, G., Roberts, M.G., Roberts, J.D. and Smith,  
5 D.L

#### 6 7 **Inclusion criteria**

8 Participants had to be highly trained, male endurance athletes. Highly trained was defined as completion  
9 of 10 km <38 minutes or 5 km <18 minutes in the previous 12 months), have a running history > 2 years,  
10 training ≥ 4 times per week with no significant change in training load or body mass in the previous 3  
11 months. Further inclusion criteria required participants to be absent of any underlying medical conditions,  
12 otherwise apparently healthy and not following a restrictive dietary regime or suffer any known food  
13 allergies or intolerances.

#### 14 15 **Trial completion cohort**

16 Of the 20 highly trained male endurance athletes entering the trial, three participants withdrew due to  
17 injury or illness (unrelated to the trial) and one additional volunteer was unable to start the second trial  
18 after the HPD intervention (reasons unrelated to the trial).

#### 19 20 **Lab visits**

21 Visit 1 consisted of briefing, familiarisation and V O<sub>2</sub>max testing. The briefing included clear verbal and  
22 diagrammatic guidance on how to collect stool samples using Fe-Col® Faecal Sample Collection kit (Alpha  
23 Laboratories, Hampshire, UK) prior to each visit.

24  
25 Participants then followed their habitual dietary intake for 7 days prior to completing pre-intervention  
26 performance testing at visit 2. Intervention diets (HPD or HCD) were then supplied, and participants were  
27 informed to follow these for 7 days prior to completing mid-intervention performance testing during visit  
28 3. In the 7 days before the fourth and final lab visit participants returned to their habitual dietary intake  
29 prior to a final, post-intervention performance test.

30  
31 Participants were advised to arrive at the laboratory using the same mode of transport and requested to  
32 refrain from morning physical exertion. Stool samples were collected either at home or in the laboratory  
33 from the first stool in the morning of each testing visit using Fe-Col® Faecal Sample Collection kit (Alpha  
34 Laboratories, Hampshire, UK) according to previous instruction. Samples were delivered to the  
35 investigator at room temperature then immediately placed in a -80 freezer and stored at that temperature  
36 until analysis. Participants then completed a 10 km steady state run at 70%  $\dot{V}O_{2max}$ , had 5 minutes rest then  
37 completed a maximum effort at 95% v  $\dot{V}O_{2max}$  max effort until volitional exhaustion.

#### 38 39 **Habitual Dietary Intake.**

40 A 3-day food diary using estimated household measures was used to collect habitual dietary intake prior  
41 to the first and third testing sessions. During the study briefing the participants were instructed how to  
42 complete the food diary and was provided with a comprehensive example. The importance of accuracy  
43 and detail was emphasised (e.g., item weight, portion size, meal breakdown, fluid intake), as was the  
44 importance of maintaining current dietary habits and documenting all food and drink consumed.  
45 Consumption of dietary supplements was considered a contraindication to participation in the trial; thus,  
46 all participants were free from dietary supplements in the period preceding and during the trial protocol.  
47 Participants were requested to record dietary intake on 2 weekdays and 1 weekend day each week between  
48 visit 1 and visit 2 and repeat again between visit 3 and visit 4. All food diaries were analysed by the same  
49 qualified nutritionist using Nutritics (Nutritics, Dublin, Ireland).

#### 50 51 **Assessment of Training Volume**

52 It was important that any observed changes were due to the intervention diet and not a due to change in  
53 training volume. Therefore, training volume was controlled throughout the experimental period.

54 Participants were requested to maintain the same weekly training programme throughout the study and  
 55 were requested to replicate, as closely as possible, each training session on the same day and time each  
 56 week, logging all training sessions with the GPS watch provided. The training sessions were automatically  
 57 uploaded online (Garmin Connect, Garmin Ltd, Schaffhausen, Switzerland) for the investigative team.

### 58 **Intervention dietary prescription**

59 Individual calorie intake for the intervention diet was calculated using basal metabolic rate (BMR)  
 60 multiplied by a physical activity factor (PAF). The equation of Henry (2005) was used to calculate BMR.  
 61 PAF was calculated depended on occupational and exercise level using a modified Nutritics equation  
 62 (Harris & Benedict, 1918):

$$63 \text{ PAL} = (0.66 \times \text{occupational factor}) + (0.33 \times \text{exercise factor})$$

64  
 65  
 66 Unless training twice a day the participant was deemed to be 'Very' active, if training twice a day 'Extra'  
 67 active was selected. Occupational multiplication factor was selected through a series of work-related  
 68 questions.

69  
 70 A total of 34 (17 CHO, 17 PRO) diet plans were prescribed by the investigative team and created by  
 71 Soulmatefood® (Waterfoot, Lancashire, UK). Starting at 1,800 kcal the diets increased by 150 kcal for each.  
 72 Participants were assigned the diet closest to their calculated interventional energy intake. The greatest  
 73 difference between estimated intervention diet and prescribed diet was 75 kcal per day. All intervention  
 74 meals were delivered to the participant's door, each receiving two deliveries; the first delivery contained  
 75 three day's food, the second four day's food. Each day food consisted of 5 pre-packaged/cooked meals  
 76 (breakfast, morning snack, lunch, afternoon snack and dinner). Matching energy intake to energy  
 77 expenditure is challenging and it was important that the participants were not in a negative energy balance  
 78 for this study therefore in addition to the calculated dietary intake, a further 500 kcal•day<sup>-1</sup> macronutrient-  
 79 matched meal was provided. Included with the delivery was a daily menu with consumption instructions.  
 80 Participants were briefed that the additional meal was only to be consumed if still hungry after consuming  
 81 the standard diet and were required to document if this additional meal was consumed. Participants were  
 82 requested to remain hydrated through the day, only consume food provided and to only drink water or  
 83 drinks free from caffeine or additional energy.

84  
 85 Table 4. Calculated mean dietary intake and macro nutrient breakdown for each group during the 7-day  
 86 intervention.

| Group | Dietary intake<br>(kcal•day <sup>-1</sup> ) | CHO (•day <sup>-1</sup> ) |                    | PRO (•day <sup>-1</sup> ) |                    | FAT (•day <sup>-1</sup> ) |                    |
|-------|---------------------------------------------|---------------------------|--------------------|---------------------------|--------------------|---------------------------|--------------------|
|       |                                             | g                         | g•kg <sup>-1</sup> | g                         | g•kg <sup>-1</sup> | g                         | g•kg <sup>-1</sup> |
| PRO   | 3185 ± 237                                  | 239 ± 18                  | 3.4 ± 0.3          | 319 ± 24                  | 4.6 ± 0.3          | 106 ± 8                   | 1.5 ± 0.1          |
| CHO   | 3281 ± 195                                  | 492 ± 29                  | 7.3 ± 0.4          | 82 ± 5                    | 1.2 ± 0.1          | 109 ± 7                   | 1.5 ± 0.1          |

87 *Prescribed dietary intake (kcal•day<sup>-1</sup>, mean ± SD) and macronutrient breakdown for the prescribed intervention diets*  
 88 *for both groups.*

### 91 **10 km steady state treadmill run**

92 Following a resting 20 µL capillary blood sample, participants completed a standardised warm-up  
 93 consisting of a 5 minutes jog at 10 km•h<sup>-1</sup> on the treadmill, followed by self- directed stretching. A  
 94 facemask (attached to the online gas analyser) was fitted and stayed on throughout the trial. Participants  
 95 were asked to straddle the treadmill and the belt speed was set to the intensity representative of 75%  
 96 VO<sub>2</sub>max (as calculated from the familiarisation session). Once the treadmill belt was up to speed whilst  
 97 holding on to the treadmill arms, the participant lowered stepped onto the belt and began running. As soon  
 98 as the participants let go of the treadmill arms the time was noted and the sub-maximal exercise trial  
 99 started. Participants had minimal visual or audible stimulus throughout the trial. After each kilometre was

100 completed the same words were repeated to the participant: Well done that is another kilometre completed,  
101 'X' to go, a capillary blood sample and rate of perceived exertion (RPE) (BORG 1070) were then collected.  
102 Participants were also informed of the distance completed at 9,500 meters. At 9,850 meters the final  
103 capillary blood sample and RPE were recorded. At 10,000 meters the participant held onto the arms of the  
104 treadmill and stepped off. A stopwatch was started immediately to time 5-minute recovery.  
105

#### 106 **Time to Exhaustion: 95% maximal sustainable effort (MaxSE).**

107 The treadmill belt was set to a speed equivalent to 95%  $v\text{VO}_2\text{max}$  (as calculated from the familiarisation  
108 session), participants straddled the belt and the facemask was fitted again. Once the 5 minutes recovery  
109 was up participants supported their weight on the arms of the treadmill and started running on the belt.  
110 Once comfortable the participants let go and the stopwatch was started to record the duration of the effort.  
111 No visual or audible encouragement was permitted throughout the trial. Participants ran until volitional  
112 fatigue, once reached participants straddled the treadmill. The stopwatch was stopped as soon as the  
113 participant reached out for the treadmill arms to support their weight. Immediately upon volitional fatigue  
114 a final capillary blood sample was collected. The same investigator timed all MaxSE efforts throughout the  
115 study.  
116

#### 117 **Sample isolation and DNA extraction**

118 All fecal samples were stored at  $-80^\circ\text{C}$ , and all extractions were carried out on ice where appropriate. Kit  
119 negatives were processed with each batch. All DNA samples were stored at  $-80^\circ\text{C}$ .

120 **Free Viral particle (FVP) isolation:** 120 mg of stool was homogenised in 3 mL of ice cold, sterile 1 x PBS  
121 and allowed to settle for 5 min. 1ml of the supernatant was used for viral DNA extraction. This was  
122 centrifuged at 4000 rpm at  $4^\circ\text{C}$  for 10 minutes, and the supernatant removed. The pellet was used for the  
123 inducible virus protocol.

124 **Induced viral particle isolation:** The pellet from 'Free viral particle isolation' was resuspended in 1 mL  
125 sterile, room temperature, 1 x PBS. Virus induction was processed with addition of norfloxacin at  $1\ \mu\text{g}/\text{mL}$   
126 and incubated for 1 hour at  $37^\circ\text{C}$ . After incubation each sample was centrifuged at 4000 rpm at  $4^\circ\text{C}$  for  
127 10 minutes. 1 ml of the supernatant was used for viral DNA extraction.

#### 128 **Viral DNA extraction**

129 Prior to DNA extraction, non-encapsulated DNA was depleted through 1 x round of  $1\ \mu\text{L}$  of TURBO  
130 DNase and  $1\ \mu\text{L}$  of RNase Cocktail (Life Technologies Limited), the solution was incubated at  $37^\circ\text{C}$  for  
131 30 min. The DNase and RNase were inactivated using heat at  $65^\circ\text{C}$  and 15 mM EDTA final concentration  
132 for 10 min. DNA was extracted from the free and chemically induced viruses using the NORGEN Phage  
133 DNA Isolation Kits (Geneflow Limited, Lichfield, UK). The manufacturers protocol was modified as per  
134 Tariq *et al.* (2015), for removal of bacterial/eukaryotic chromosomal DNA. Kit negatives were processed  
135 with each batch.

#### 136 **Total DNA isolation for microbial community analysis**

137 DNA was extracted from 1 mL of homogenised stool, harvested as a pellet after centrifugation at 4000 rpm  
138 at  $4^\circ\text{C}$  for 10 minutes, and the supernatant discarded. Prior to DNA extraction, extracellular DNA was  
139 depleted through 1 x round of  $1\ \mu\text{L}$  of TURBO DNase and  $1\ \mu\text{L}$  of RNase Cocktail (Life Technologies  
140 Limited), the solution was incubated at  $37^\circ\text{C}$  for 30 min. The DNase and RNase were inactivated using  
141 heat at  $65^\circ\text{C}$  and 15 mM EDTA final concentration for 10 min. QIAGEN DNeasy PowerLyzer PowerSoil  
142 DNA Isolation Kits (Geneflow Limited, Lichfield, UK) was used as per manufacturers instructions. Kit  
143 negatives were processed with each batch. All DNA samples were stored at  $-80^\circ\text{C}$ .

#### 144 **Genome sequencing**

145  
146 **Bacterial Community amplicon sequencing and analysis:** The V4 region of the 16S rRNA gene, was used  
147 as a target for amplicon sequencing using the approach detailed by Kozich *et al.* (2013) (NU-OMICS,  
148 Northumbria University at Newcastle, UK).

149 **Viral Community sequencing and analysis:** The Viral DNA samples were prepared to libraries using the  
150 Illumina Nextera XT (Illumina, Saffron Waldon, UK) kit. A V3 600 bp kit was used for the loading and  
151 running of the sample. The DNA samples were diluted to 0.2 ng/ $\mu$ L (Qubit 2.0 DS HS DNA Kit, Life  
152 Technologies Limited). The Illumina Nextera XT library preparation kit was used as per manufacturers  
153 instructions. The samples were normalised using Illumina based bead solution. The samples were pooled  
154 and loaded onto the MiSeq. The quality of the run had a Q30 score of >75%. This generated paired end  
155 FASTQ files (NU-OMICS, Northumbria University at Newcastle, UK).

#### 156 **Data clean-up and read count/distribution**

157 The sequenced reads were adapter trimmed and quality filtered using Trimmomatic (Bolger *et al.*, 2014)  
158 and Sickle (Joshi & Fass, 2011) respectively.

159 Bacterial and fungal operational taxonomic units (OTU's) were defined using the OptiClust method in  
160 Mothur (Kozich *et al.* 2013). Taxonomy for each OTU was assigned using the Silva database for bacterial  
161 OTUs and the UNTIE database for fungal OTUs .

162 Viral shotgun sequencing reads were concatenated and converted from fastq to fasta format. The raw reads  
163 were blastn searched (Altschul *et al.*, 1990) against a preformatted NCBI database using word size 20 and  
164 percentage identity 70. For the viral analysis the pre curated viral database was downloaded and used as  
165 a reciprocal viral database.

166 Megan 6 was used to analyse the blast output file (Huson *et al.*, 2007) where lowest common ancestor and  
167 relative abundance was calculated from the data. The sample groups were then loaded for comparison and  
168 normalized by count and assessed based on genus rank.

169 A program tool was built to identify fold change and p values for every taxa identified (10's of thousands),  
170 which it then further cross-compared and filtered within the program to statistically identify taxa of  
171 interest. This was necessary due to the PCoA approach to visualizing the data as a whole.

172 A second program was created 'ViralHostFinder', which was used to find the related bacterial host of each  
173 viral taxa identified.

174  
175 Sequence counts were normalised by conversion to relative abundance for single-omic analyses (i.e.  
176 comparing two bacterial communities), or cumulative sum-scaling followed by centered log-ratio  
177 transformation for multi-omic analyses (i.e. comparing combined bacterial, FVP and IV communities).

#### 178 179 **Sequencing output parameters**

180 A total of  $1.79 \times 10^4$  viral sequencing contigs, assembled from shotgun sequence reads, mapped to 231 taxa  
181 within the NCBI viral database. These sequencing contigs were spread across FVP ( $8.95 \times 10^3$ ), and IV ( $8.96$   
182  $\times 10^3$ ) communities. Mean sequencing contigs per sample were  $186.66 \pm 36.65$ . Targeted bacterial 16S rRNA  
183 gene sequencing yielded  $3.43 \times 10^6$  sequence reads from  $8.82 \times 10^3$  bacterial taxa following removal of  
184 control samples from analysis. Mean reads per sample was  $7.14 \times 10^4 \pm 2.30 \times 10^4$ . Fungal communities  
185 yielded very low sequence reads per sample (mean  $98.55 \pm 278.70$ ), and as such these communities were  
186 not included in further analysis.

#### 187 188 **Classification of responders and non-responders to dietary periodisation**

189 Study participants were classified as either responders' or non-responders based on the impact each dietary  
190 intervention had on time trial to exhaustion performance. A linear regression model was built based on the  
191 overall response of each participant to the relevant periodisation diet. Because HCD generally improved  
192 performance HCD responders were defined as those whose performance at TTE *improved* more than would  
193 be estimated by the linear regression model. In contrast, HPD generally reduced performance, therefore  
194 responders to this diet were defined as those whose performance at TTE *reduced* more than estimated by  
195 the model.

#### 196 197 **Grouping functional genes by functional category**

198 VOG annotated genes are already classified as either viral structure or replication genes. We further  
199 classified those without any previous classification in to one of 9 high level functional groups according to

200 string searches performed on assigned Consensus Functional Descriptions of VOGs as outlined in the table  
 201 below:  
 202

| <i>Functional group</i>       | <i>Associated strings</i>                                                                                                                            | <i>VOGs count</i> |
|-------------------------------|------------------------------------------------------------------------------------------------------------------------------------------------------|-------------------|
| DNA/RNA processes             | DNA, RNA, Resolvase, Helicase, Polymerase, Primase, Transcription, Topoisomerase, Replicase, Endonuclease, Exonuclease,                              | 566               |
| Host metabolism               | Phosphatase, Transferase, Esterase, Hydrolase, Reductase, Kinase,                                                                                    | 366               |
| Host lysis                    | Lysin, Holin, Tubin                                                                                                                                  | 104               |
| Host infection                | Recombinase, Integrase, Excisionase, Terminase, protein alc, prr                                                                                     | 182               |
| Viral Structure               | Tegument, Head, Tail, Baseplate, Tail fibre, Capsid, Spike, Structural, Envelope, Virion, Decoration, Scaffolding, Matrix, lipoprotein, glycoprotein | 999               |
| Viral replication             | rIIa, rIIb, Deoxytidylate deaminase, Replication                                                                                                     | 84                |
| Putative/hypothetical protein | Putative, Hypothetical                                                                                                                               | 24380             |
| Uncharacterised               | Uncharacterised                                                                                                                                      | 792               |

203  
 204 All genes assigned Consensus Functional descriptions that did not match any of the strings listed above  
 205 were classified as 'Other' (886 genes).  
 206

207 **References**

208  
 209 Altschul, S. F. et al. (1990) 'Basic local alignment search tool', *Journal of Molecular Biology*, 215(3), pp. 403–  
 210 410. doi: 10.1016/S0022-2836(05)80360-2.  
 211  
 212 Bolger, A. M., Lohse, M. and Usadel, B. (2014) 'Trimmomatic: A flexible trimmer for Illumina sequence  
 213 data', *Bioinformatics*. doi: 10.1093/bioinformatics/btu170.  
 214  
 215 Harris, J. A. and Benedict, F. G. (1918) 'A Biometric Study of Human Basal Metabolism', *Proceedings of the*  
 216 *National Academy of Sciences*, 4(12), pp. 370 LP – 373. doi: 10.1073/pnas.4.12.370.  
 217  
 218 Henry, C. J. K. (2005) 'Basal metabolic rate studies in humans: measurement and development of new  
 219 equations', *Public Health Nutrition*. 2007/01/02. Cambridge University Press, 8(7a), pp. 1133–1152. doi:  
 220 DOI: 10.1079/PHN2005801.  
 221  
 222 Huson, D. H. et al. (2007) 'MEGAN analysis of metagenomic data', *Genome Research*. doi:  
 223 10.1101/gr.5969107.  
 224  
 225 Joshi, N. and Fass, J. (2011) 'Sickle: A sliding-window, adaptive, quality-based trimming tool for FastQ files  
 226 (Version 1.33) [Software]', Available at <https://github.com/najoshi/sickle>.  
 227  
 228 Kozich, J. J. et al. (2013) 'Development of a Dual-Index Sequencing Strategy and Curation Pipeline for  
 229 Analyzing Amplicon Sequence Data on the MiSeq Illumina Sequencing Platform', *Applied and*  
 230 *Environmental Microbiology*, 79(17), pp. 5112–5120. doi: 10.1128/Aem.01043-13.  
 231  
 232 Tariq, M. A. et al. (2015) 'A metagenomic approach to characterize temperate bacteriophage populations  
 233 from Cystic Fibrosis and non-Cystic Fibrosis bronchiectasis patients', *Frontiers in Microbiology*. *Frontiers*  
 234 *Research Foundation*, 6(FEB). doi: 10.3389/fmicb.2015.00097.  
 235
