# Supplementary material for: Gut Microbial Stability is Associated with Greater Endurance Performance in Athletes Undertaking Dietary Periodization
Source: PubMed Central journal article supplement (PMC9238380; doi:10.1128/msystems.00129-22), 2022-05-17

**Supplementary figure 2 – Beta-diversity within bacterial communities in this study is significantly lower than within bacterial communities in the Human Microbiome Project**  
**Dynamic changes in the gut microbiota in response to acute high protein and high carbohydrate diets in endurance athletes.**

Furber, M.J.W., Young, G.R., Holt, G., Pyle, S. Howatson, G., Roberts, M.G., Roberts, J.D. and Smith, D.L

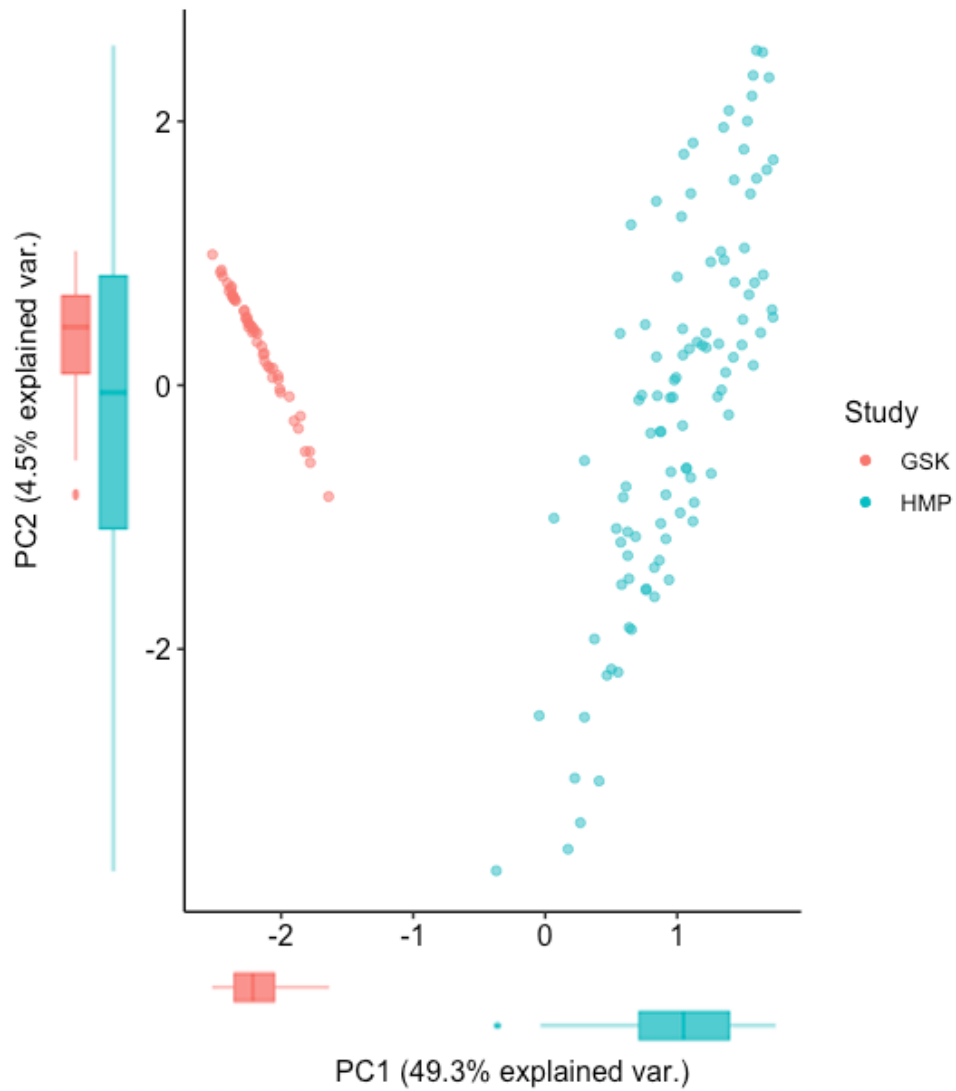

Supplement: msystems.00129-22-s0003.pdf [file msystems.00129-22-s0003.pdf]
