# Supplementary material for: Gut Microbial Stability is Associated with Greater Endurance Performance in Athletes Undertaking Dietary Periodization
Source: PubMed Central journal article supplement (PMC9238380; doi:10.1128/msystems.00129-22), 2022-05-17
Supplement: msystems.00129-22-s0004.pdf [file msystems.00129-22-s0004.pdf]

**Supplementary figure 3 – Shifts in beta-diversity of gut microbiota are visible during dietary intervention and are associated with endurance performance**

**Dynamic changes in the gut microbiota in response to acute high protein and high carbohydrate diets in endurance athletes.**

Furber, M.J.W., Young, G.R., Holt, G., Pyle, S. Howatson, G., Roberts, M.G., Roberts, J.D. and Smith, D.L

**Seperate biomes**

**Combined biomes**

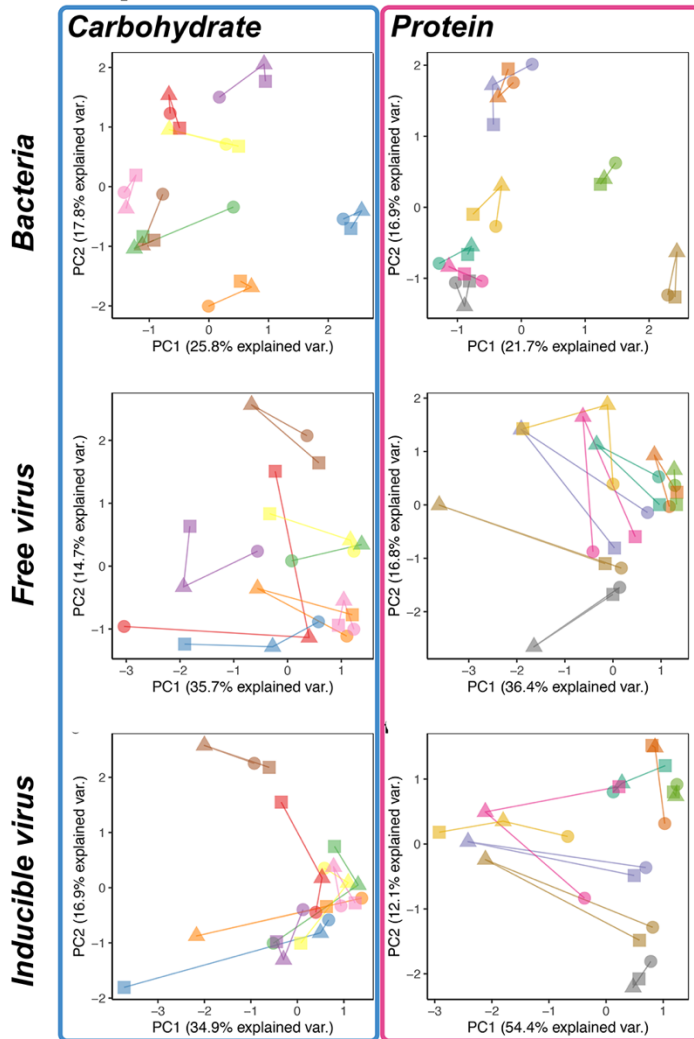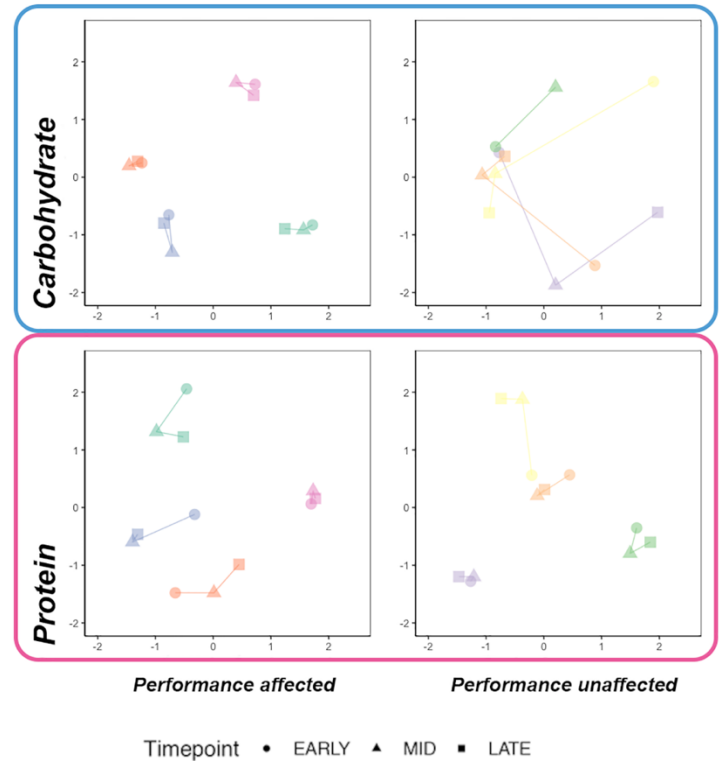

Timepoint • EARLY ▲ MID ■ LATE
