# Supplementary material for: Gut Microbial Stability is Associated with Greater Endurance Performance in Athletes Undertaking Dietary Periodization
Source: PubMed Central journal article supplement (PMC9238380; doi:10.1128/msystems.00129-22), 2022-05-17
Supplement: msystems.00129-22-s0006.pdf [file msystems.00129-22-s0006.pdf]

**Supplementary table 1 – Adonis PERMANOVA results: gut microbial alpha-diversity**

**Dynamic changes in the gut microbiota in response to acute high protein and high carbohydrate diets in endurance athletes.**

Furber, M.J.W., Young, G.R., Holt, G., Pyle, S. Howatson, G., Roberts, M.G., Roberts, J.D. and Smith, D.L

|                                   | <b>BACTERIAL</b> | <b>FVP</b> | <b>IV</b> |
|-----------------------------------|------------------|------------|-----------|
| <b>Fisher-alpha</b>               |                  |            |           |
| <i>HCD vs HPD (early)</i>         | 0.34             | 0.60       | 0.04*     |
| <i>HCD vs HPD (mid)</i>           | 0.67             | 0.46       | 0.04*     |
| <i>HCD vs HPD (late)</i>          | 0.52             | 0.25       | 0.30      |
| <i>EARLY vs MID vs LATE (HCD)</i> | 0.54             | 0.64       | 0.15      |
| <i>EARLY vs MID vs LATE (HPD)</i> | 0.85             | 0.31       | 0.04*     |
| <b>Richness</b>                   |                  |            |           |
| <i>HCD vs HPD (early)</i>         | 0.34             | 0.40       | 0.21      |
| <i>HCD vs HPD (mid)</i>           | 0.60             | 0.60       | 0.07      |
| <i>HCD vs HPD (late)</i>          | 0.60             | 0.25       | 0.12      |
| <i>EARLY vs MID vs LATE (HCD)</i> | 0.56             | 0.28       | 0.34      |
| <i>EARLY vs MID vs LATE (HPD)</i> | 0.83             | 0.13       | 0.18      |
