# Supplementary material for: Gut Microbial Stability is Associated with Greater Endurance Performance in Athletes Undertaking Dietary Periodization
Source: PubMed Central journal article supplement (PMC9238380; doi:10.1128/msystems.00129-22), 2022-05-17
Supplement: msystems.00129-22-s0007.pdf [file msystems.00129-22-s0007.pdf]

**Supplementary table 2 – Adonis PERMANOVA results: gut microbial beta-diversity**

**Dynamic changes in the gut microbiota in response to acute high protein and high carbohydrate diets in endurance athletes.**

Furber, M.J.W., Young, G.R., Holt, G., Pyle, S. Howatson, G., Roberts, M.G., Roberts, J.D. and Smith, D.L

|                                   | BACTERIAL      |        | FVP            |        | IV             |        |
|-----------------------------------|----------------|--------|----------------|--------|----------------|--------|
|                                   | R <sup>2</sup> | P      | R <sup>2</sup> | P      | R <sup>2</sup> | P      |
| <b>Adonis PERMANOVA</b>           |                |        |                |        |                |        |
| <b>Variables</b>                  |                |        |                |        |                |        |
| <i>Patient</i>                    | 0.80           | 0.001* | 0.51           | 0.001* | 0.52           | 0.001* |
| <i>Diet : Time point</i>          | 0.03           | 0.216  | 0.10           | 0.001* | 0.10           | 0.009* |
| <i>Residuals</i>                  | 0.17           | -      | 0.38           | -      | 0.38           | -      |
| <b>Time points by diet</b>        |                |        |                |        |                |        |
| <i>EARLY vs MID vs LATE (HCD)</i> | 0.03           | 0.397  | 0.07           | 0.192  | 0.06           | 0.459  |
| <i>EARLY vs MID vs LATE (HPD)</i> | 0.03           | 0.241  | 0.14           | 0.002* | 0.13           | 0.009* |
| <b>pairwise Adonis PERMANOVA</b>  |                |        |                |        |                |        |
| <b>Carbohydrate</b>               |                |        |                |        |                |        |
| <i>EARLY vs MID</i>               | -              | -      | -              | -      | -              | -      |
| <i>EARLY vs LATE</i>              | -              | -      | -              | -      | -              | -      |
| <i>MID vs LATE</i>                | -              | -      | -              | -      | -              | -      |
| <b>Protein</b>                    |                |        |                |        |                |        |
| <i>EARLY vs MID</i>               | -              | -      | 0.15           | 0.023* | 0.16           | 0.016* |
| <i>EARLY vs LATE</i>              | -              | -      | 0.04           | 0.351  | 0.16           | 0.781  |
| <i>MID vs LATE</i>                | -              | -      | 0.10           | 0.110  | 0.10           | 0.102  |
